# Supplementary material
Source: HighWire-hosted journal article supplement (https://cmaj.ca/highwire/filestream/80130/field_highwire_adjunct_files/0/211087-image-1-at.pdf)

Appendix 1: Angioedema of the lips

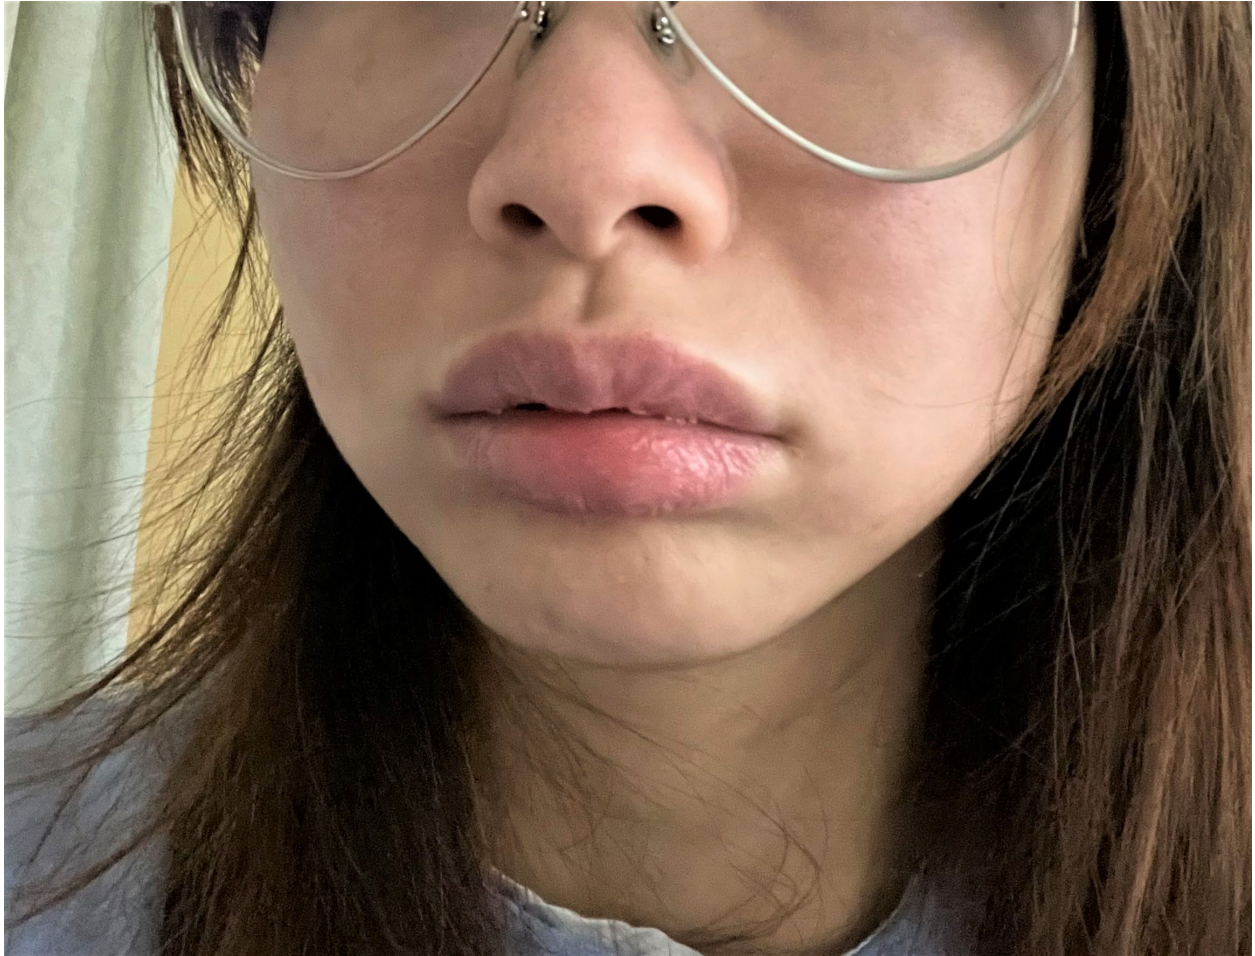

Supplement: 211087-image-1-at.pdf [file 211087-image-1-at.pdf]
